# Supplementary material
Source: publisher figshare collection journal article supplement (https://rs.figshare.com/ndownloader/files/15256550)

**A** Control (on triangular ridges)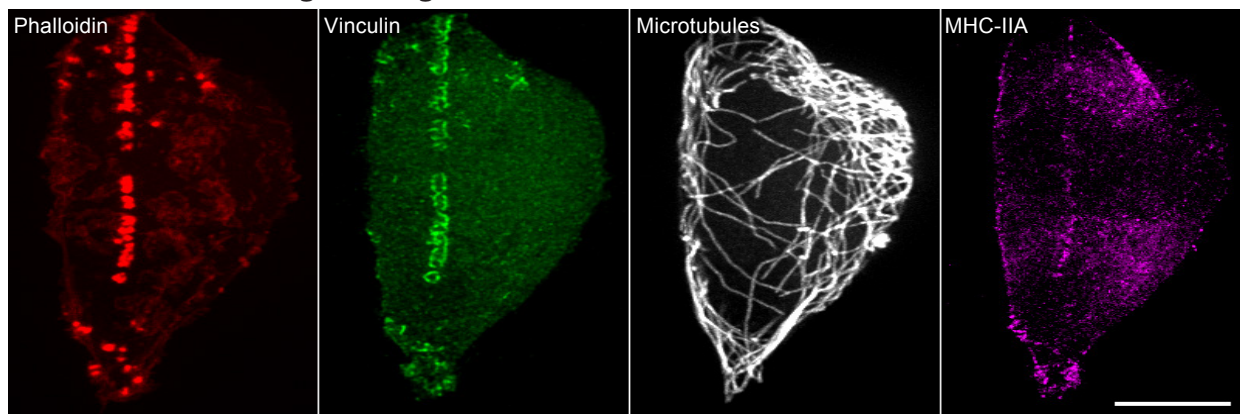**B** Nocodazole + Y-27632 (on triangular ridges)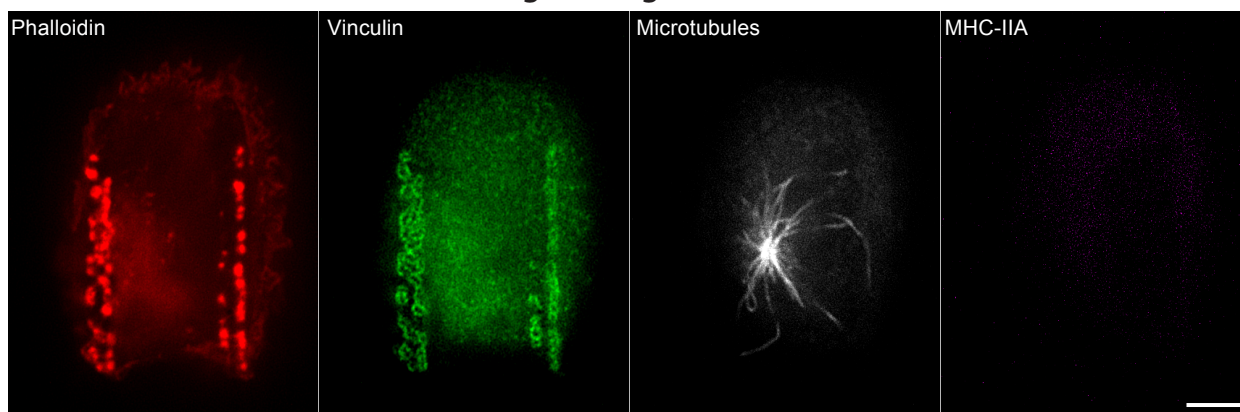

Supplement: Supplementary file 1 [file 15256550]
